# Supplementary material
Source: PubMed Central journal article supplement (PMC2755545)
Supplement: NIHMS147334-supplement-Supp_Table.pdf [file NIHMS147334-supplement-Supp_Table.pdf]

**Table. Interaction of IAS<sub>5</sub> with Antithrombin in the presence of varying concentrations of NaCl at pH 7.4 and 25 °C.<sup>@</sup>**

| <b>[NaCl]</b> | <b>Slope</b>                     | <b>Intercept</b>                                       | <b>K<sub>D</sub><sup>@</sup></b> |
|---------------|----------------------------------|--------------------------------------------------------|----------------------------------|
| <i>(mM)</i>   | <i>(<math>\mu M^{-1}</math>)</i> | <i>(<math>cm^2 \mu M^{-1} min^{-1} kV^{-1}</math>)</i> | <i>(<math>\mu M</math>)</i>      |
| 0             | -0.0270 ± 0.0040 <sup>§</sup>    | -0.0850 ± 0.0040                                       | 37 ± 6                           |
| 10            | -0.0167 ± 0.0024                 | -0.0390 ± 0.0010                                       | 60 ± 8                           |
| 20            | -0.0075 ± 0.0006                 | -0.0190 ± 0.0030                                       | 133 ± 10                         |
| 50            | -0.0039 ± 0.0002                 | -0.0094 ± 0.0007                                       | 256 ± 12                         |

<sup>@</sup> The binding affinities at 0, 10, 20 and 50 mM NaCl were measured as described in 'Materials and Methods' and shown in Figure 5. Scatchard analysis was performed to obtain the slope and intercept from which K<sub>D</sub> values were calculated. <sup>§</sup> Errors represent ±2 S. E.
